# Supplementary material for: Manganese cluster-based MOF as efficient polysulfide-trapping platform for high-performance lithium–sulfur batteries
Source: Royal Society of Chemistry journal article supplement (doi:10.1039/c8ta09973a), 2019-01-01
Supplement: c8ta09973a1.pdf [file c8ta09973a1.pdf]

Supporting Information

**Manganese cluster-based MOF as efficient polysulfide-trapping platform for high-performance lithium-sulfur batteries**

Xiao-Fei Liu,<sup>a</sup> Xiao-Qing Guo,<sup>a</sup> Rui Wang,<sup>a</sup> Qing-Chao Liu,\*<sup>a</sup> Zhong-Jun Li,<sup>a</sup> Shuang-Quan Zang,\*<sup>a</sup> and Thomas C. W. Mak<sup>a, b</sup>

<sup>a</sup> College of Chemistry and Molecular Engineering, Zhengzhou University, Zhengzhou 450001, China

<sup>b</sup> Department of Chemistry and Center of Novel Functional Molecules, The Chinese University of Hong Kong, Shatin, New Territories Hong Kong SAR, China

Author for correspondence: **Prof. S.-Q. Zang; Dr. Q.-C. Liu**

## EXPERIMENTAL SECTION

### Materials.

Except where mentioned, all of the materials for synthesizing were obtained commercially and used without further purification. All the solvents used in experiments were of analytical grade.

### Instrumentation and Measurements

$^1\text{H}$  and  $^{13}\text{C}$  NMR spectra were recorded on a Bruker DRX spectrometer operating at 400 MHz in  $\text{DMSO-}d_6$ . Elemental analyses (EA) were gained using a Perkin-Elmer 240 elemental analyzer. Powder X-ray diffraction (PXRD) patterns of the samples were implemented on a Rigaku B/Max-RB diffractometer. Thermogravimetry analyses (TGA) were performed on a TA Q50 system under  $\text{N}_2$  atmosphere at a heating rate of  $10\text{ }^\circ\text{C min}^{-1}$ . Water sorption isotherms at 298 K were measured by a BEL-max physisorption analyzer after soaked the samples in methanol for 3 days with renewal once a day and then pretreated under vacuum at  $150\text{ }^\circ\text{C}$  for 12 h. X-ray photoelectron spectroscopy (XPS) measurements were performed with a VG Scientific ESCALAB 250 instrument. The morphology and microstructure of the fabricated materials are characterized by a field emission scanning electron microscopy, JEOL model JSM-6700 FE-SEM, operating at an accelerating voltage of 1.5 or 5.0 kV. The CV of coin cells was measured with a two-probe method with CHI660e electrochemical working station (CH Instrument Inc.). Electrical measurements were performed in air at a constant temperature of 298 K. The Nyquist plots of the samples were studied by CompactStat-Plus2 (Ivium) in a frequency range of 0.1 Hz to 100000 Hz.

### Single-Crystal X-ray Diffraction Analyses

Single-crystal X-ray diffraction (SCXRD) measurements of **Mn-CCs-xH<sub>2</sub>O** and **Mn-CCs** were performed on a Rigaku XtaLAB Pro diffractometer with  $\text{Cu-K}\alpha$  radiation ( $\lambda = 1.54178\text{ \AA}$ ) at variable temperatures. All structures were solved by the direct method<sup>[1]</sup> and refined with the full-matrix least-squares technique on  $F^2$  by the *SHELXTL*-2013 software package.<sup>[2]</sup> All the non-hydrogen atoms were refined anisotropically. Fourier difference maps ( $F_o - F_c$ ) in bitmap and contour styles were both computed in the WinGX program system. Other hydrogen atoms were placed geometrically. Displacement parameter restraints were used in modeling the ligands and solvent molecules. Hydrogen atoms were placed geometrically on their riding atom where possible. The diffuse electron densities resulting from the residual solvent molecules were removed from the data set using the SQUEEZE routine of PLATON and further refined using the data generated.<sup>[3]</sup> The contents of the solvent region are not represented in the unit cell contents in the crystal data. Detailed structure determination parameters and crystallographic data are given in Table S1. Relevant bond lengths and bond angles are displayed in Table S2. More details on the crystallographic data are given in the X-ray crystallographic files in CIF format. As for the pre-experiments of single crystal X-ray diffraction during the transformation from **Mn-CCs-xH<sub>2</sub>O** to **Mn-CCs**, the crystal was fixed on goniometer head and test in situ after being automatically immersed in  $\text{N}_2$  atmosphere for a certain period of time. Crystallographic data for the structure reported in this paper have also been deposited with CCDC (No. 1865016-1865015).

### Synthesis of the H<sub>4</sub>L ligand

H<sub>4</sub>L was synthesized according to the reference.<sup>[4]</sup>

### Synthesis of Mn-CCs-xH<sub>2</sub>O ( $[\text{Mn}_{1.125}(\text{OH})_{0.25}(\text{H}_2\text{O})_{1.75}\text{L}_{0.5}]_n$ )

The ligand 5-phosphonomethyl-isophthalic acid (H<sub>4</sub>L) was synthesized according to the reference (**Scheme S1**) and characterized by  $^1\text{H}$  NMR and  $^{13}\text{C}$  NMR (Supporting information). In the typical procedure, a solution of  $\text{MnCl}_2 \cdot 4\text{H}_2\text{O}$  (197.8 mg, 1 mmol) and H<sub>4</sub>L (260.1 mg, 1 mmol) in 40 mL N, N-dimethyl

formamide and deionized water (v/v, 1/1) was added in a 100 mL teflon-lined stainless steel container and heated at 140 °C for 3 days and then cooled to room temperature. Colorless cubical block crystals of **Mn-CCs-xH<sub>2</sub>O** were collected and washed with deionized water. Yield: 75% based on manganese. Elemental analysis, Calcd (%) for C<sub>36</sub>H<sub>50</sub>Mn<sub>9</sub>O<sub>44</sub>P<sub>4</sub> (1805.10): C 23.95, H 2.79, P 6.86; Found (%): C 24.01, H 2.78, P 6.91. And the nanoparticle of **Mn-CCs-xH<sub>2</sub>O** was synthesized with the addition of 1 mL ammonium hydroxide in above mixed solution and used for property tests.

#### **Synthesis of Mn-CCs ([Mn<sub>1.125</sub>(OH)<sub>0.25</sub>L<sub>0.5</sub>]<sub>n</sub>)**

The H<sub>2</sub>O adsorption isotherm of **Mn-CCs-xH<sub>2</sub>O** (Figure 3b) proved that it can absorb H<sub>2</sub>O at very low relative humidity (RH). To remove the guest solvent in **Mn-CCs-xH<sub>2</sub>O**, the powder of **Mn-CCs-xH<sub>2</sub>O** was soaked in methanol for 3 days and then filtered and dried in surrounding condition and further heated at 150 °C under vacuum conditions for 12 h to obtain the activated **Mn-CCs**.

#### **Preparation of S@Mn-CCs**

The activated **Mn-CCs** and sulfur with the mass ratio of 3:7 were mixed by hand-milling in an Ar filled glovebox (O<sub>2</sub>, H<sub>2</sub>O < 0.1 ppm) and fabricated through melt-diffusion method at 155 °C in a teflon-lined stainless steel container filled with Ar for 12 h. After cooling to room temperature, S@**Mn-CCs** cathode materials were collected.

#### **Preparation of S@CNTs**

The synthesis procedure is similar to that of S@**Mn-CCs**.

#### **Preparation of S/Mn-CCs**

The activated **Mn-CCs** and sulfur with the mass ratio of 3:7 were mixed by hand-milling in an Ar filled glovebox (O<sub>2</sub>, H<sub>2</sub>O < 0.1 ppm).

#### **Fabrication of the coin Li-S battery**

70 wt% S@**Mn-CCs** composite, 20 wt% CNTs and 10 wt% poly(vinylidene fluoride) (PVDF) binder were mixed in N-methyl-2-pyrrolidinone (NMP) to form a slurry. The slurry was then coated on carbolic current collectors as cathode and dried at 60 °C for 12 h. Coin cells 2025 were assembled in an Ar filled glovebox (O<sub>2</sub>, H<sub>2</sub>O < 0.1 ppm) with an electrolyte of 1.0 M lithium difluoromethanesulfonate (LiTFSI) and 0.1 M LiNO<sub>3</sub> in DOL/DME (v/v, 1/1), Celgard 2400 membrane, and Li foil reference anode. For all of the electrochemical tests, the sulfur mass loading was about 2.0 mg/cm<sup>2</sup>.

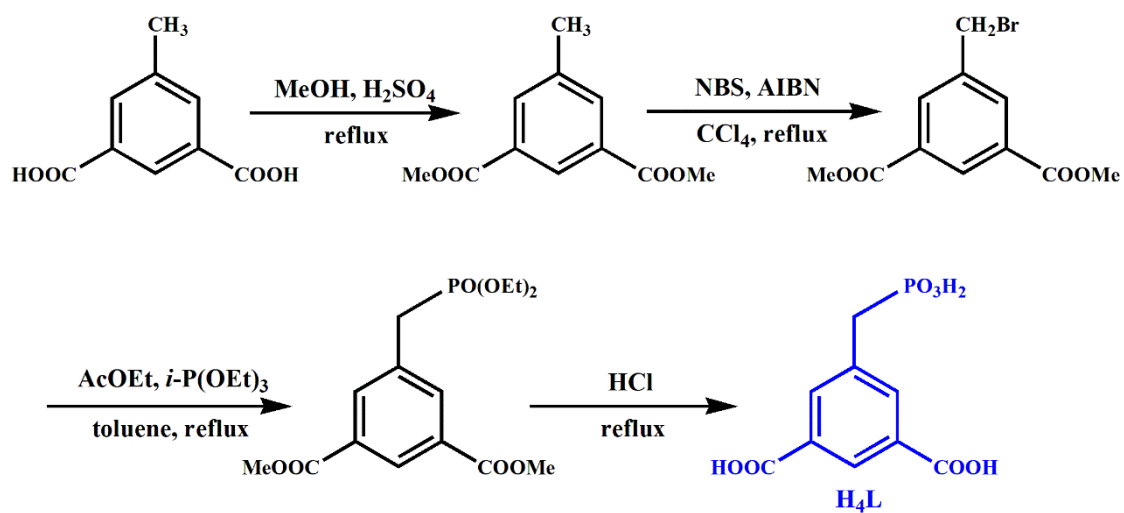

Scheme S1. Synthesis of the ligand H<sub>4</sub>L.

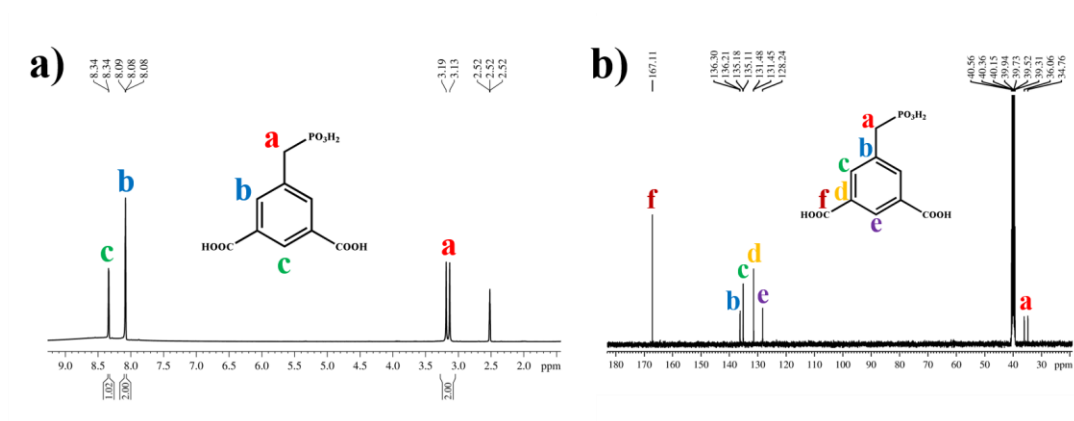

Fig. S1  $^1\text{H}$  (a) and  $^{13}\text{C}$  (b) NMR of H<sub>4</sub>L ligand.

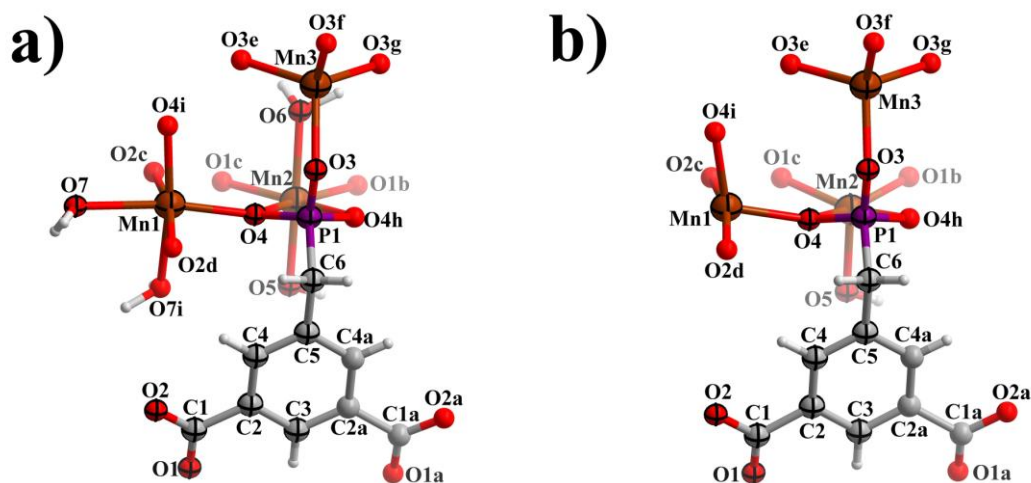

**Fig. S2** Perspective views of the coordination environments in (a) **Mn-CCs-xH<sub>2</sub>O** and (b) **Mn-CCs**. Symmetry codes: (a) a = x, y, 1-z; b = y, z, 1-x; c = y, z, x; d = 1/2-x, 1/2-z, 1/2-y; e = -1/2+z, 1/2-y, 1/2-x; f = -x, y, 1-z; g = 1/2-z, 1/2-y, 1/2+x; h = x, y, 1-z; i = 1/2-z, 1/2-y, 1/2-x; (b) a = 1-x, y, z; b = z, 1-x, y; c = 1-z, 1-x, y; d = 1/2+y, -1/2+x, 1/2-z; e = 1/2+z, 1/2-y, -1/2+x; f = x, y, -z; g = 1/2-z, 1/2-y, -1/2+x; h = 1-x, y, z; i = 1/2+z, 1/2-y, -1/2+x.

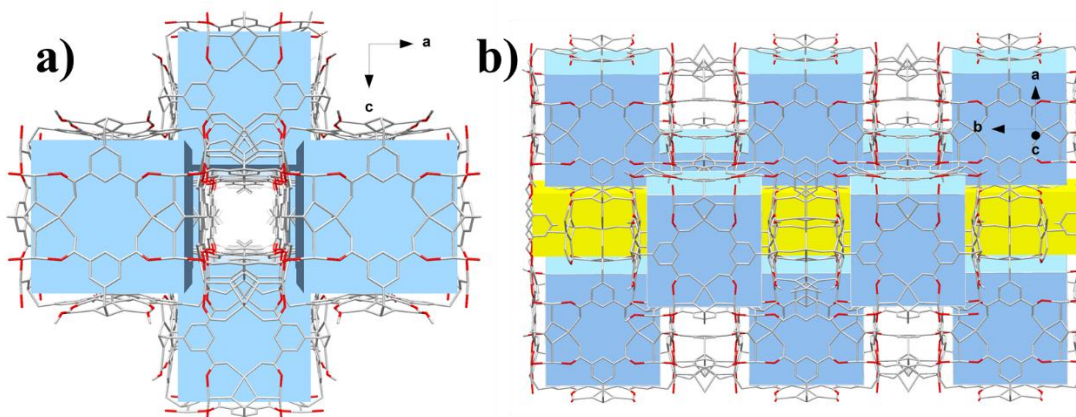

**Fig. S3** Perspective views of 1D channel stacked by cages in **Mn-CCs-xH<sub>2</sub>O** along (a) *b* axis and (b) *c* axis.

**Table S1** Crystal structure and refinement details of MOFs

|                                                                                          | Mn-CCs-xH <sub>2</sub> O                                                       | Mn-CCs                                                                         |
|------------------------------------------------------------------------------------------|--------------------------------------------------------------------------------|--------------------------------------------------------------------------------|
| Empirical formula                                                                        | C <sub>36</sub> H <sub>50</sub> Mn <sub>9</sub> O <sub>44</sub> P <sub>4</sub> | C <sub>36</sub> H <sub>22</sub> Mn <sub>9</sub> O <sub>30</sub> P <sub>4</sub> |
| Formula weight                                                                           | 1805.10                                                                        | 1552.87                                                                        |
| Temperature / K                                                                          | 100                                                                            | 500                                                                            |
| Crystal system                                                                           | cubic                                                                          | cubic                                                                          |
| Space group                                                                              | <i>Pm</i> $\bar{3}$ <i>n</i>                                                   | <i>Pm</i> $\bar{3}$ <i>n</i>                                                   |
| a/Å                                                                                      | 22.5987(2)                                                                     | 22.2297(2)                                                                     |
| b/Å                                                                                      | 22.5987(2)                                                                     | 22.2297(2)                                                                     |
| c/Å                                                                                      | 22.5987(2)                                                                     | 22.2297(2)                                                                     |
| $\alpha$ /°                                                                              | 90                                                                             | 90                                                                             |
| $\beta$ /°                                                                               | 90                                                                             | 90                                                                             |
| $\gamma$ /°                                                                              | 90                                                                             | 90                                                                             |
| Volume/Å <sup>3</sup>                                                                    | 11541.2(3)                                                                     | 10985.0(3)                                                                     |
| Z                                                                                        | 6                                                                              | 6                                                                              |
| Density (calculated) / g cm <sup>-3</sup>                                                | 1.557                                                                          | 1.378                                                                          |
| Absorption coefficient / mm <sup>-1</sup>                                                | 13.182                                                                         | 13.583                                                                         |
| F(000)                                                                                   | 5418.0                                                                         | 4470.0                                                                         |
| Reflections collected                                                                    | 25236                                                                          | 10898                                                                          |
| Independent reflections                                                                  | 2285                                                                           | 1798                                                                           |
| Data / restraints / parameters                                                           | 1786/24/134                                                                    | 1798/12/100                                                                    |
| Goodness-of-fit on $F^2$                                                                 | 1.071                                                                          | 1.077                                                                          |
| <sup>a</sup> R <sub>1</sub> , <sup>b</sup> wR <sub>2</sub> [ <i>I</i> > 2σ ( <i>I</i> )] | 0.0595, 0.1722                                                                 | 0.1158, 0.3645                                                                 |
| <sup>a</sup> R <sub>1</sub> , <sup>b</sup> wR <sub>2</sub> (all data)                    | 0.0614, 0.1752                                                                 | 0.1349, 0.3822                                                                 |

$$R_1 = \frac{\sum ||F_o| - |F_c||}{\sum |F_o|}, wR_2 = [\frac{\sum w(F_o^2 - F_c^2)^2}{\sum w(F_o^2)^2}]^{1/2}.$$

**Table S2** Selected bond distances (Å) and angles (°) for **Mn-CCs-xH<sub>2</sub>O** and **Mn-CCs**.

| <b>Mn-CCs-xH<sub>2</sub>O</b> |            |             |            |
|-------------------------------|------------|-------------|------------|
| Mn1–O2c                       | 2.111(3)   | Mn2–O4      | 2.272(3)   |
| Mn1–O4                        | 2.133(4)   | Mn2–O5      | 2.130(11)  |
| Mn1–O7                        | 2.288(5)   | Mn2–O6      | 2.219(6)   |
| Mn2–O1c                       | 2.110(4)   | Mn3–O3      | 2.116(5)   |
| O2c–Mn1–O2d                   | 168.4(3)   | O1b–Mn2–O6  | 84.9(2)    |
| O2c–Mn1–O4                    | 93.94(14)  | O1c–Mn2–O4  | 95.55(13)  |
| O2c–Mn1–O4i                   | 93.38(14)  | O1c–Mn2–O4h | 159.78(14) |
| O2c–Mn1–O7                    | 88.22(18)  | O1c–Mn2–O5  | 92.1(3)    |
| O2c–Mn1–O7i                   | 83.02(19)  | O1c–Mn2–O6  | 84.9(2)    |
| O2d–Mn1–O4                    | 93.38(14)  | O4–Mn2–O4h  | 64.85(15)  |
| O2d–Mn1–O4i                   | 93.94(14)  | O4–Mn2–O5   | 94.1(3)    |
| O2d–Mn1–O7                    | 83.02(19)  | O4–Mn2–O6   | 89.97(19)  |
| O2d–Mn1–O7i                   | 88.22(18)  | O4h–Mn2–O5  | 94.1(3)    |
| O4–Mn1–O4i                    | 101.79(18) | O4h–Mn2–O6  | 89.97(19)  |
| O4–Mn1–O7                     | 169.72(18) | O5–Mn2–O6   | 175.1(4)   |
| O4–Mn1–O7i                    | 88.09(17)  | O3–Mn3–O3e  | 111.17(13) |
| O4i–Mn1–O7                    | 88.09(17)  | O3–Mn3–O3f  | 106.1(3)   |
| O4i–Mn1–O7i                   | 169.72(18) | O3–Mn3–O3g  | 111.17(13) |
| O1b–Mn2–O1c                   | 103.4(2)   | O3e–Mn3–O3f | 111.17(13) |
| O1b–Mn2–O4                    | 159.77(14) | O3e–Mn3–O3g | 106.1(3)   |
| O1b–Mn2–O4h                   | 95.55(13)  | O3f–Mn3–O3g | 111.17(13) |
| O1b–Mn2–O5                    | 92.1(3)    |             |            |
| <b>Mn-CCs</b>                 |            |             |            |
| Mn1–O2c                       | 2.044(8)   | Mn2–O4      | 2.225(6)   |
| Mn1–O4                        | 2.079(6)   | Mn2–O5      | 1.81(5)    |
| Mn2–O1c                       | 2.021(9)   | Mn3–O3      | 2.053(10)  |
| O2c–Mn1–O2d                   | 166.3(6)   | O1c–Mn2–O4h | 151.2(4)   |
| O2c–Mn1–O4                    | 95.8(3)    | O1c–Mn2–O5  | 97.9(13)   |
| O2c–Mn1–O4i                   | 92.0(3)    | O4–Mn2–O4h  | 64.7(3)    |
| O2d–Mn1–O4                    | 95.8(3)    | O4–Mn2–O5   | 105.7(16)  |
| O2d–Mn1–O4i                   | 92.0(3)    | O4h–Mn2–O5  | 105.7(16)  |
| O4–Mn1–O4i                    | 109.8(4)   | O3–Mn3–O3e  | 108.5(3)   |
| O1b–Mn2–O1c                   | 99.5(6)    | O3–Mn3–O3f  | 111.4(6)   |
| O1b–Mn2–O4                    | 151.2(4)   | O3–Mn3–O3g  | 108.5(3)   |
| O1b–Mn2–O4h                   | 93.4(3)    | O3e–Mn3–O3f | 108.5(3)   |
| O1b–Mn2–O5                    | 97.9(13)   | O3e–Mn3–O3g | 111.4(6)   |
| O1c–Mn2–O4                    | 93.4(3)    | O3f–Mn3–O3g | 108.5(3)   |

Symmetry codes: (a) b = y, z, 1-x; c = y, z, x; d = 1/2-x, 1/2-z, 1/2-y; e = -1/2+z, 1/2-y, 1/2-x; f = -x, y, 1-z; g = 1/2-z, 1/2-y, 1/2+x; h = x, y, 1-z; i = 1/2-z, 1/2-y, 1/2-x; (b) 1-x, y; c = 1-z, 1-x, y; d = 1/2+y, -1/2+x, 1/2-z; e = 1/2+z, 1/2-y, -1/2+x; f = x, y, -z; g = 1/2-z, 1/2-y, -1/2+x; h = 1-x, y, z; i = 1/2+z, 1/2-y, -1/2+x.

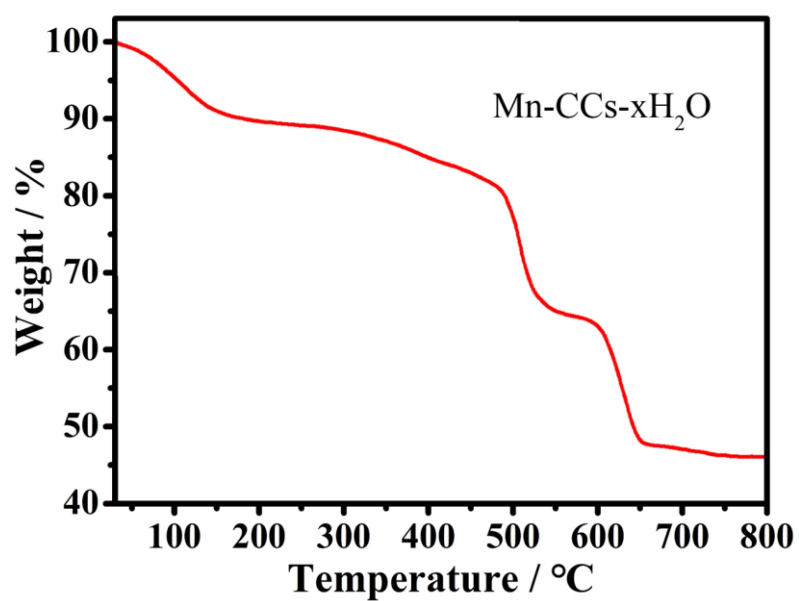

**Fig. S4** TGA of sample Mn-CCs-xH<sub>2</sub>O.

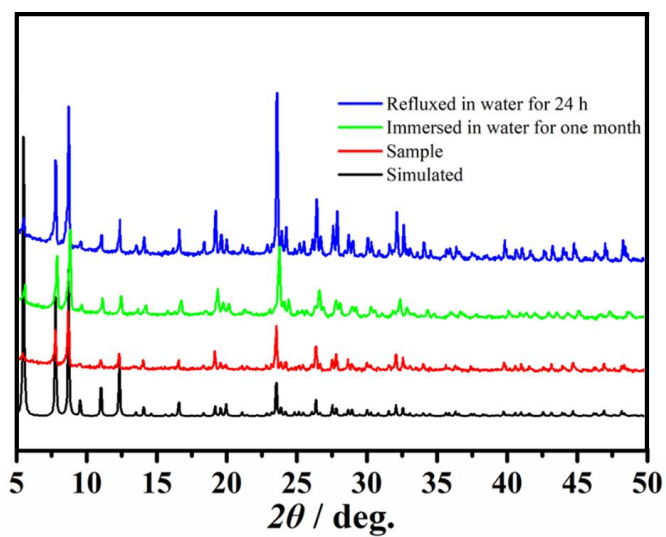

**Fig. S5** PXRD patterns of Mn-CCs-xH<sub>2</sub>O samples soaked in water for one month and in boiling water for 24 hours.



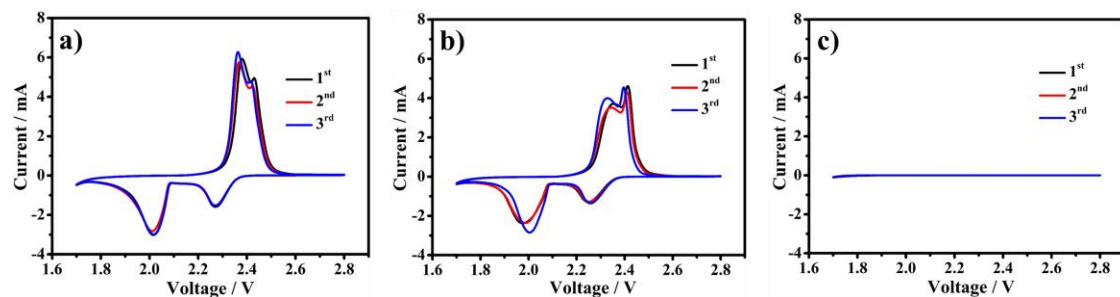

**Fig. S6** CV curves of (a) S@Mn-CCs, (b) S@CNTs and (c) Mn-CCs cathodes for the first three cycles at a scan rate at  $0.1 \text{ mV s}^{-1}$  in the voltage range of 1.7-2.8 V.

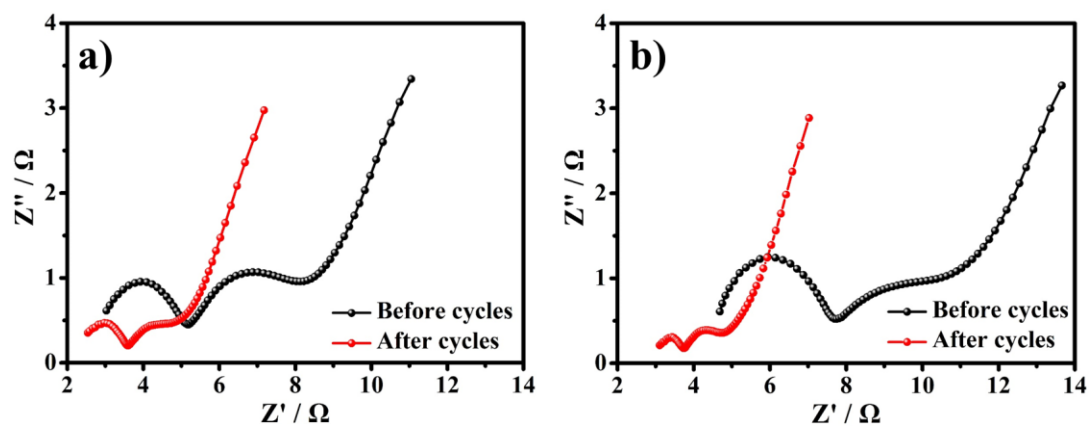

**Fig. S7** Nyquist plots of batteries with (a) S@Mn-CCs and (b) S@CNTs before and after 10 cycles.

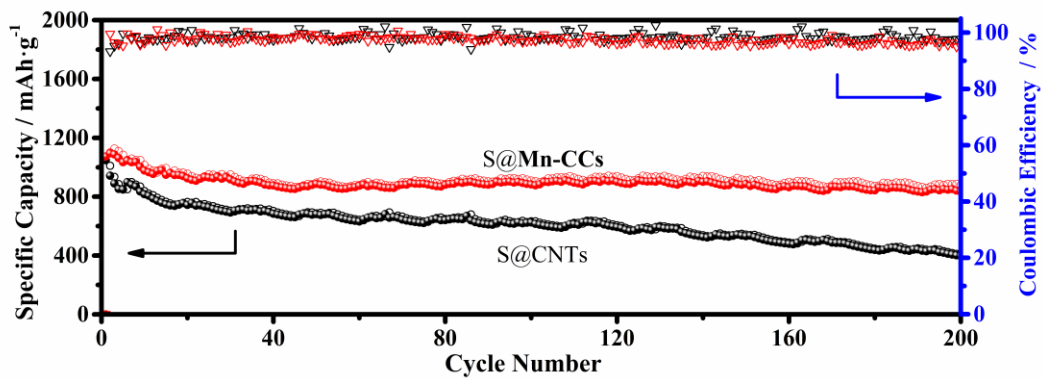

**Fig. S8** Cycling stability of the S@Mn-CCs and S@CNTs cathodes at 0.5 C.

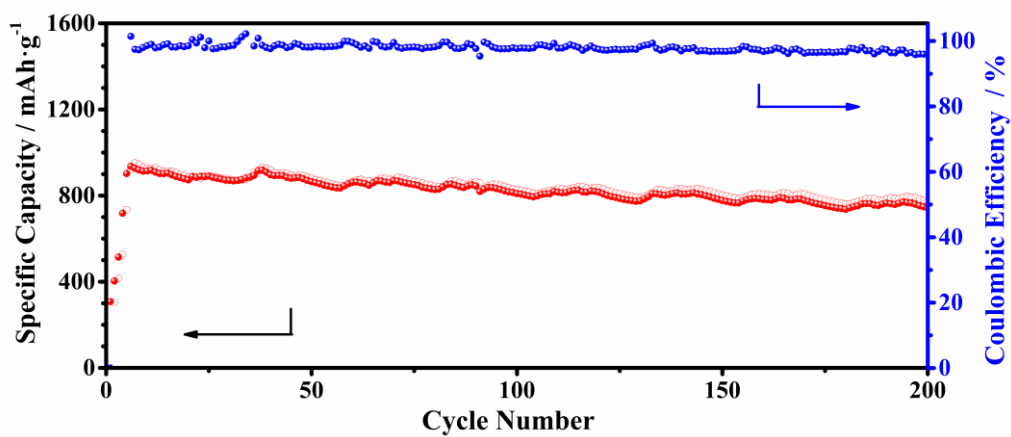

**Fig. S9** Cycling stability of the S@Mn-CCs cathodes at 1.0 C.

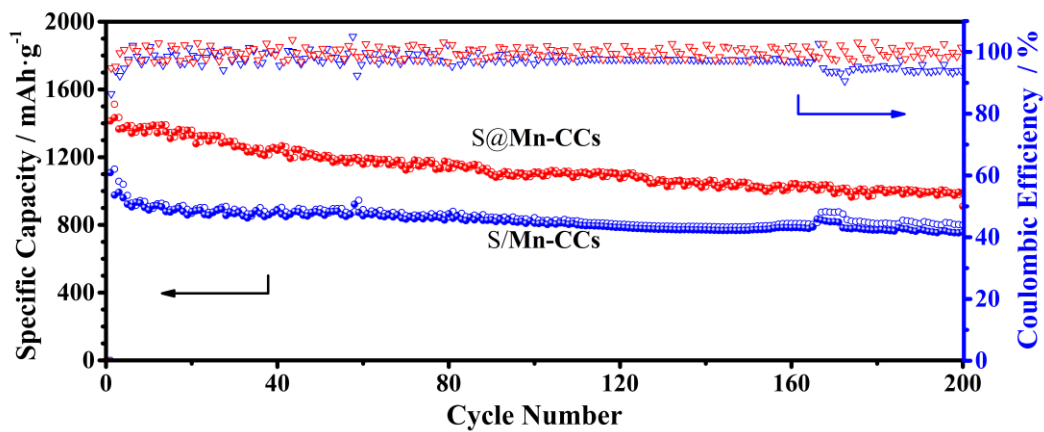

**Fig. S10** Cycling stability of the S@Mn-CCs and S/Mn-CCs cathodes at 0.2 C.

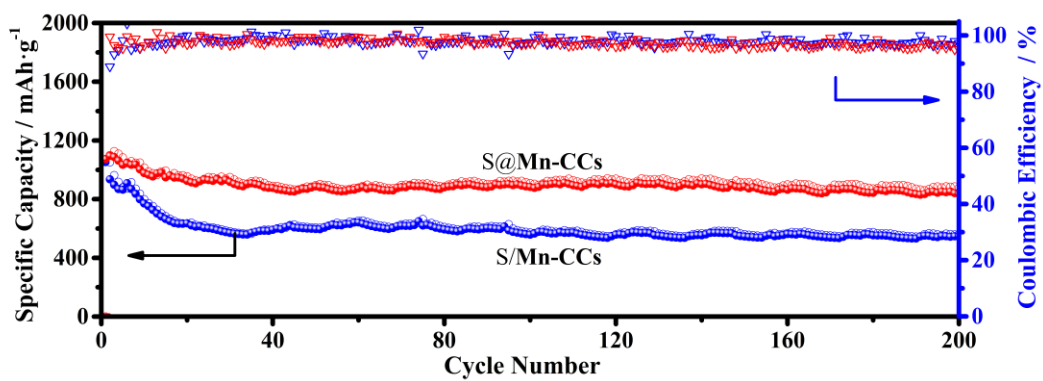

**Fig. S11** Cycling stability of the S@Mn-CCs and S/Mn-CCs cathodes at 0.5 C.

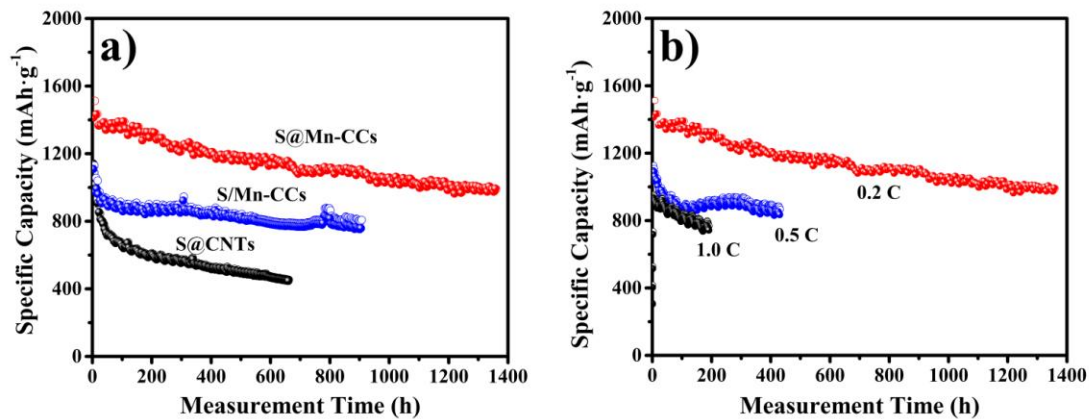

**Fig. S12** Cycling stability within 200 cycles for (a) samples at 0.2 C and (b) S@Mn-CCs at different cycling rates.

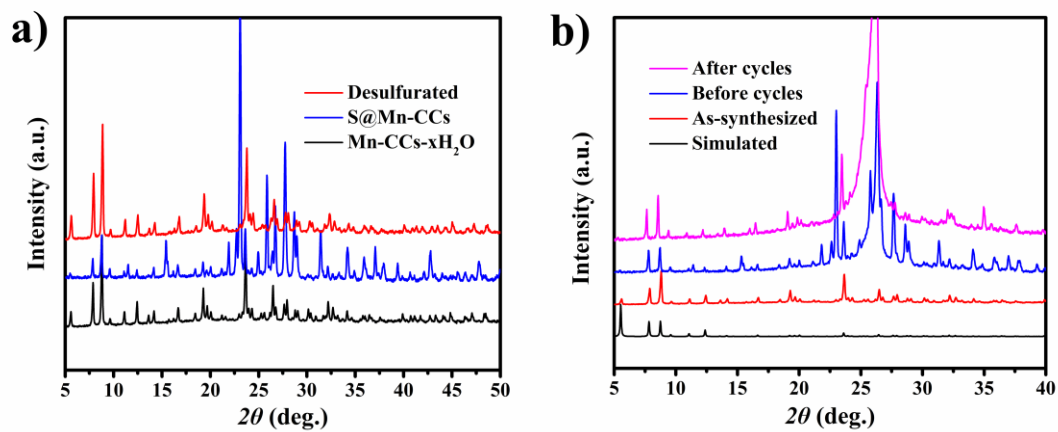

**Fig. S13** PXRD spectra of (a) desulfurated S@Mn-CCs and (b) the cathode discharged thoroughly after 100 cycles. The cathode was washed with CS<sub>2</sub>, acetonitrile and ethanol successively.

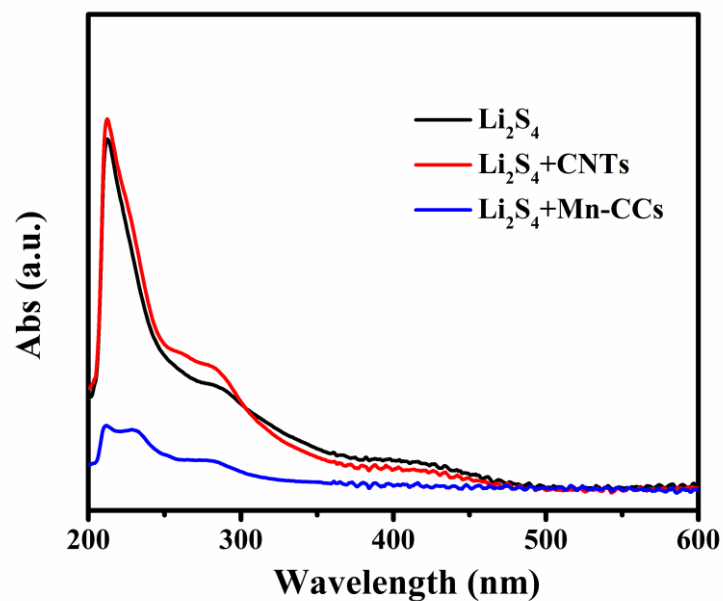

**Fig. S14** UV-Vis spectra of  $\text{Li}_2\text{S}_4$  solution before and after the addition of samples.

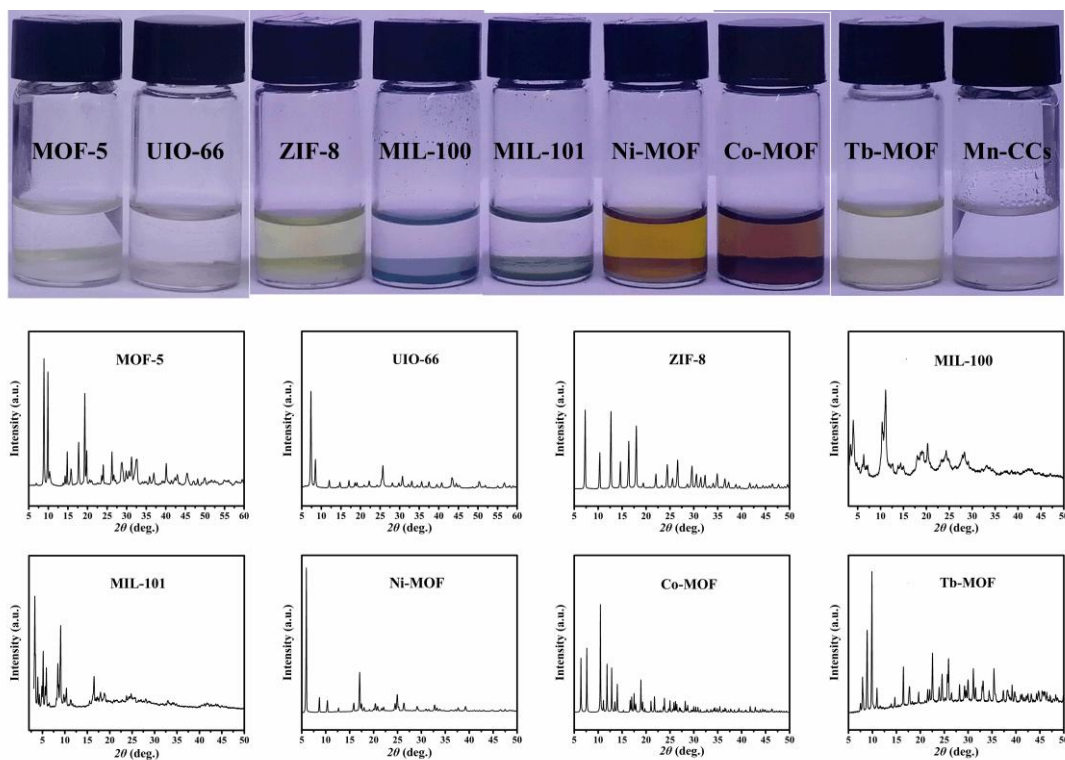

**Fig. S15** Adsorption behavior of  $\text{Li}_2\text{S}_4$  by different MOFs. (MOF-5: ref. S5; UiO-66: ref. S6; ZIF-8: ref. 27; MIL-100: ref. S15; MIL-101: ref. 28; Ni-MOF: ref. S7; Co-MOF: ref. S8; Tb-MOF: ref. S9)

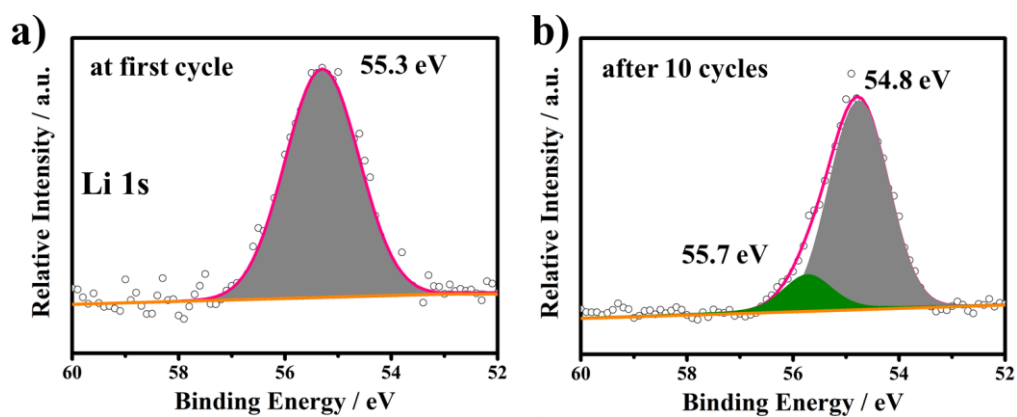

**Fig. S16** Li 1s XPS spectra of the cathode S@Mn-CCs discharged to 2.0 V (a) at first cycle and (b) after 10 cycles.

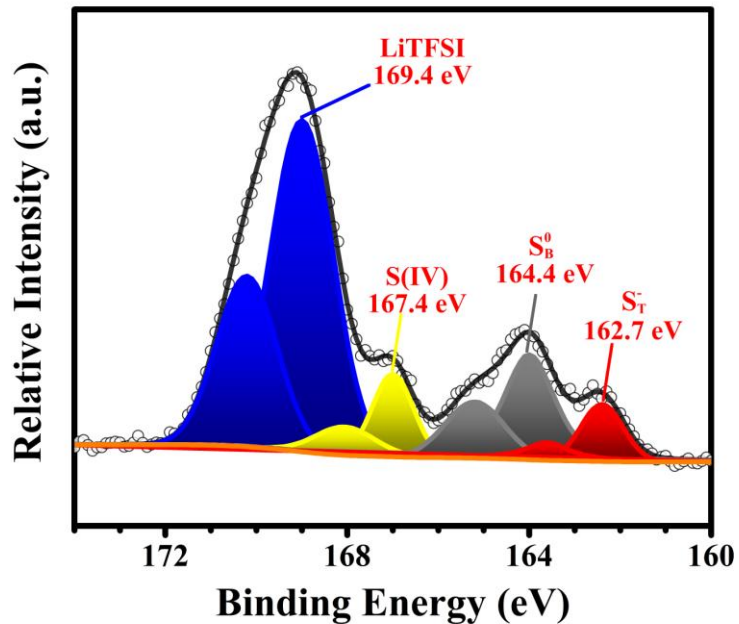

**Fig. S17** XPS of S 2p spectra of a pristine battery with the cathode of S@CNTs recharged after 10 cycles.

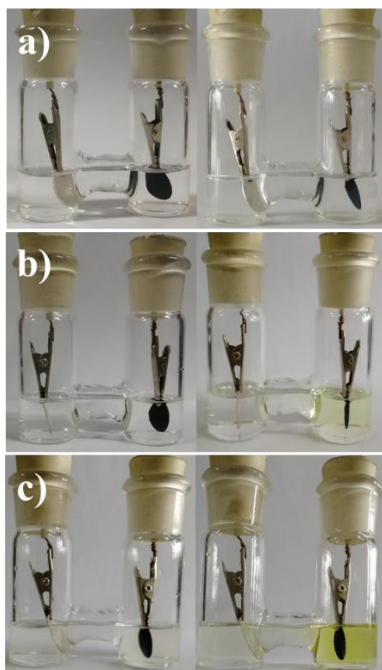

**Fig. S18** Visual confirmation of LiPSs entrapment under discharge condition ( $100 \text{ mA g}^{-1}$ ): (a) S@Mn-CCs, (b) S/Mn-CCs and (c) S@CNTs, respectively.

**Table S3** A summary of MOFs as the cathode of Li-S battery <sup>7</sup>

| MOF used                                             | Feature                                           | S loading wt%         | Specific capacity mAh g <sup>-1</sup> | Current density C        | Cycle number             | Voltage vs. Li/Li <sup>+</sup> V | Reference        | Metal     |
|------------------------------------------------------|---------------------------------------------------|-----------------------|---------------------------------------|--------------------------|--------------------------|----------------------------------|------------------|-----------|
| ZIF-8                                                | Cage-like pores                                   | 50                    | 553                                   | 0.5                      | 300                      | 1.8-2.8                          | 27               | Zn        |
| HKUST-1                                              | Lewis acidic Cu(II) site                          | 50                    | 286                                   | 0.5                      | 300                      | 1.8-2.8                          | 27               | Cu        |
| NH <sub>2</sub> -MIL-53                              | NH <sub>2</sub> group                             | 50                    | 332                                   | 0.5                      | 300                      | 1.8-2.8                          | 27               | Al        |
| MIL-53                                               | 1D channel                                        | 50                    | 347                                   | 0.5                      | 300                      | 1.8-2.8                          | 27               | Al        |
| MIL-101(Cr)                                          | Cage-like pores                                   | 48                    | 410                                   | 0.1                      | 60                       | 1.0-3.0                          | 28               | Cr        |
| MIL-101(Cr)                                          | Graphene wrapping                                 | 58.8                  | 809                                   | 0.8                      | 134                      | 1.0-3.0                          | 29               | Cr        |
| HKUST-1                                              | CNT interpenetration                              | 1 mg cm <sup>-2</sup> | 700                                   | 0.2                      | 500                      | 1.7-2.8                          | 30               | Cu        |
| MOF-5                                                | CNT interpenetration                              | 1 mg cm <sup>-2</sup> | 770                                   | 0.2                      | 50                       | 1.7-2.8                          | 30               | Zn        |
| ZIF-8                                                | CNT interpenetration                              | 1 mg cm <sup>-2</sup> | 600                                   | 0.2                      | 50                       | 1.7-2.8                          | 30               | Zn        |
| MOF-525                                              | Lewis acidic Cu(II) site                          | 50                    | 700                                   | 0.5                      | 200                      | 1.5-3.0                          | 31               | Cu        |
| Ni <sub>6</sub> (BTB) <sub>4</sub> (BP) <sub>3</sub> | Lewis acidic Cu(II) site                          | 60                    | 611                                   | 0.1                      | 100                      | 1.5-3.0                          | 38               | Ni        |
| ZIF-8                                                | Cage-like pores                                   | 30                    | 510                                   | 0.1                      | 100                      | 1.0-3.0                          | S10              | Zn        |
| MIL-101(Cr)                                          | rGO substrate                                     | 50                    | 650                                   | 0.2                      | 50                       | 1.5-3.0                          | S11              | Cr        |
| nMOF-867                                             | Nitrogen atoms in linkers                         | 50                    | 790                                   | 0.5                      | 100                      | 1.7-2.8                          | S12              | Zr        |
| ZIF-8                                                | 200 nm particle siz                               | 54                    | 60                                    | 0.5                      | 250                      | 1.8-2.8                          | S13              | Zn        |
| Cd-based MOF                                         | Semiopen channel                                  | 72                    | 799                                   | 0.1                      | 50                       | 1.5-3.0                          | S14              | Cd        |
| MIL-100(V)                                           | rGO substrate                                     | 50                    | 650                                   | 0.1                      | 75                       | 1.6-3.0                          | S15              | V         |
| ZIF-8                                                | 800 nm                                            | 24                    | 170                                   | 0.2                      | 1000                     | 1.4-3.0                          | S16              | Zn        |
| ZIF-67                                               | 1 μm                                              | 21                    | 150                                   | 0.2                      | 1000                     | 1.4-3.0                          | S16              | Co        |
| HKUST-1                                              | 500 nm                                            | 32                    | 250                                   | 0.2                      | 1000                     | 1.4-3.0                          | S16              | Cu        |
| <b>Mn-CCs</b>                                        | <b>Cubic cages &amp; Lewis acidic Mn(II) site</b> | <b>70</b>             | <b>990</b><br><b>743</b>              | <b>0.2</b><br><b>1.0</b> | <b>200</b><br><b>200</b> | <b>1.7-2.8</b>                   | <b>This work</b> | <b>Mn</b> |



## References

- S1 G. M. Sheldrick, *SHELXS-97, Program for Solution of Crystal Structures*, University of Göttingen, Germany, 1997.
- S2 G. M. Sheldrick, *SHELXL-97, Program for Crystal Structures Refinement*, University of Göttingen, Germany, 1997.
- S3 A. L. Spek, *J. Appl. Crystallogr.* 2003, **36**, 7–13.
- S4 Y.-S. Wei, X.-P. Hu, Z. Han, X.-Y. Dong, S.-Q. Zang and T. C. W. Mak, *J. Am. Chem. Soc.* 2017, **139**, 3505–3512.
- S5 Y. Zhang, J. Zhou, X. Chen, Q. Feng and W. Cai, *J. Alloy. Compd.*, 2019, **777**, 109–118.
- S6 J. H. Cavka, S. Jakobsen, U. Olsbye, N. Guillou, C. Lamberti, S. Bordiga and K. P. Lillerud, *J. Am. Chem. Soc.*, 2008, **130**, 13850–13851.
- S7 R. A. Agarwal, A. Aijaz, C. Sañudo, Q. Xu and P. K. Bharadwaj, *Cryst. Growth Des.*, 2013, **13**, 1238–1245.
- S8 X.-Y. Dong, B. Li, B.-B. Ma, S.-J. Li, M.-M. Dong, Y.-Y. Zhu, S.-Q. Zang, Y. Song, H.-W. Hou and T. C. W. Mak, *J. Am. Chem. Soc.*, 2013, **135**, 10214–10217
- S9 X.-Y. Dong, R. Wang, J.-Z. Wang, S.-Q. Zang and T. C. W. Mak, *J. Mater. Chem. A*, 2015, **3**, 641–647.
- S10 Z. Wang, Z. Dou, Y. Cui, Y. Yang, A. Wang and G. Qian, *Microporous Mesoporous Mater.*, 2014, **185**, 92–96.
- S11 W. Bao, Z. Zhang, Y. Qu, C. Zhou, X. Wang and J. Li, *J. Alloys Compd.*, 2014, **582**, 334–340.
- S12 J. H. Park, K. M. Choi, D. K. Lee, B. C. Moon, S. R. Shin, M.-K. Song and J. K. Kang, *Sci. Rep.*, 2016, **6**, 25555.
- S13 J. Zhou, X. Yu, X. Fan, X. Wang, X. Wang, H. Li, Y. Zhang, W. Li, J. Zheng, B. Wang and X. Li, *J. Mater. Chem. A*, 2015, **3**, 8272–8275.
- S14 M. T. Li, Y. Sun, K. S. Zhao, Z. Wang, X.-L. Wang, Z.-M. Su and H.-M. Xie, *ACS Appl. Mater. Interfaces*, 2016, **8**, 33183–33188.
- S15 Y. Hou, H. Mao and L. Xu, *Nano Res.*, 2016, **10**, 344–353.
- S16 L. Bai, D. Chao, P. Xing, L. J. Tou, Z. Chen, A. Jana, Z. X. Shen and Y. Zhao, *ACS Appl. Mater. Interfaces*, 2016, **8**, 14328–14333.
